# Supplementary material
Source: publisher figshare collection journal article supplement (https://frontiersin.figshare.com/ndownloader/files/34122885)
Supplement: Supplementary file [file 34122885]

| Study                     | Selection bias | Study design | Confounders | Data collection methods | Withdrawals and drop outs | Global Rating |
|---------------------------|----------------|--------------|-------------|-------------------------|---------------------------|---------------|
| Abegaz, T 2014            | Yellow         | Yellow       | Green       | Green                   | Green                     | Green         |
| Abreu, D. R. O. M 2018    | Green          | Yellow       | Yellow      | Green                   | White                     | Green         |
| Andreuccetti, G 2011      | Red            | Yellow       | Yellow      | Green                   | White                     | Yellow        |
| Aney, Madhav S 2019       | Yellow         | Yellow       | Yellow      | Green                   | White                     | Green         |
| Chandran, A 2014          | Green          | Yellow       | Green       | Green                   | White                     | Green         |
| Damsere-Derry, J 2019     | Green          | Yellow       | Green       | Green                   | Red                       | Yellow        |
| Gómez-García, L 2014      | Green          | Yellow       | Green       | Green                   | White                     | Green         |
| González, J. F 2016       | Green          | Yellow       | Green       | Green                   | White                     | Green         |
| Guimarães, A 2019         | Red            | Yellow       | Yellow      | Green                   | White                     | Yellow        |
| Guo, Y 2015               | Yellow         | Red          | Green       | Green                   | White                     | Yellow        |
| Gupta, A 2013             | Yellow         | Red          | Green       | Green                   | White                     | Yellow        |
| Habyarimana, J 2011       | Yellow         | Green        | Green       | Yellow                  | Green                     | Green         |
| Huang, J. Y 2019          | Yellow         | Yellow       | Green       | Red                     | White                     | Yellow        |
| Ji, Y 2017                | Green          | Green        | Green       | Green                   | Green                     | Green         |
| Jomar, R 2019             | Red            | Yellow       | Green       | Green                   | White                     | Yellow        |
| Khorasani-Zavareh, D 2013 | Green          | Yellow       | Green       | Green                   | Green                     | Green         |
| Leitão, P. A 2019         | Green          | Red          | Green       | Green                   | White                     | Yellow        |
| Liu, Pan 2011             | Yellow         | Red          | Green       | Green                   | White                     | Yellow        |
| Martínez-Ruíz 2019        | Yellow         | Yellow       | Green       | Green                   | White                     | Green         |
| Muni, K 2019              | Red            | Yellow       | Yellow      | Green                   | Green                     | Yellow        |
| Murad, M. K 2012          | Yellow         | Yellow       | Red         | Green                   | Green                     | Yellow        |
| Nazif-Munoz, J. I 2018_B  | Green          | Yellow       | Yellow      | Green                   | White                     | Green         |
| Nazif-Munoz, J. I 2018_S  | Green          | Yellow       | Green       | Green                   | White                     | Green         |
| Phung, D 2019             | Green          | Yellow       | Yellow      | Green                   | Green                     | Green         |
| Quistberg, D. A 2014      | Green          | Yellow       | Green       | Green                   | Yellow                    | Green         |
| Sebego, M 2014            | Red            | Yellow       | Yellow      | Green                   | White                     | Yellow        |
| Sheng, R 2018             | Green          | Yellow       | Green       | Green                   | White                     | Green         |
| Soori, H 2011             | Yellow         | Red          | Yellow      | Green                   | White                     | Yellow        |
| Vasudevan, V 2016         | Yellow         | Red          | Yellow      | Green                   | White                     | Yellow        |
| Volpe, F. M 2016          | Yellow         | Yellow       | Yellow      | Green                   | White                     | Green         |
| Woratanarat, P 2013       | Yellow         | Yellow       | Yellow      | Green                   | White                     | Green         |
| Xiong, Xiuqin 2019        | Red            | Yellow       | Green       | Green                   | White                     | Yellow        |
| Zhao, A 2016              | Yellow         | Yellow       | Green       | Green                   | White                     | Green         |

*Appendix 3. Quality assessment using EPHP. Green=Strong, Yellow= Medium, Red= Weak and White= Not applicable. The EPHP assesses studies based on eight criteria: Selection bias, Study design, Confounders, Blinding, Data collection methods, Withdrawal and dropouts, Intervention integrity and analyses (this section is descriptive without score) and scores them as "strong", "moderate" or "weak" . Due to the nature of road safety interventions, the research team decided not to consider blinding criteria from the final scoring*
